# Supplementary material
Source: publisher figshare collection journal article supplement (https://acs.figshare.com/ndownloader/files/4680412)
Supplement: Supplementary file 1 [file 4680412]

**Supporting Information**

**4-Anilino-5-carboxamido-2-pyridone Derivatives as Non-competitive Inhibitors of Mitogen-Activated Protein Kinase Kinase**

Julie A. Spicer, Gordon W. Rewcastle, Michael D. Kaufman, Shannon L. Black, Mark S. Plummer, William A. Denny, John Quin III, Aurash B. Shahripour, Stephen D. Barrett, Christopher E. Whitehead, Jared B. J. Milbank, Jeffrey F. Ohren, Richard C. Gowan, Charles Omer, Heidi S. Camp, Nadia Esmaeil, Kelley Moore, Judith S. Sebolt-Leopold, Sally Pryzbranowski, Ronald L. Merriman, Daniel F. Ortwine, Joseph S. Warmus, Cathlin M. Flamme, Alexander G. Pavlovsky,Haile Tecle.

**Contents:**

Table 1: Elemental Analysis Results for Target Compounds S2

Table 2: HRMS and HPLC for Target Compounds S3

Table 3: Elemental Analyses for Selected Intermediates S3

HPLC Traces for compounds **28**, **29**, **35**, **72** and **76** S4-S8

**Table 1. Elemental Analysis Results for Target Compounds**

|  |  | Calcd | | | Found | | |
| --- | --- | --- | --- | --- | --- | --- | --- |
| Cmpd |  | C | H | N | C | H | N |
| **16** | C15H14FIN2O3 | 43.3 | 3.4 | 6.7 | 43.7 | 3.1 | 7.0 |
| **21** | C13H10FIN2O3 | 40.2 | 2.6 | 7.2 | 40.5 | 2.3 | 7.3 |
| **26** | C15H15FIN3O4 | 40.3 | 3.4 | 9.4 | 40.6 | 3.6 | 9.1 |
| **27** | C13H11FIN3O2 | 40.3 | 2.9 | 10.9 | 40.6 | 2.7 | 10.9 |
| **30** | C15H15FIN3O3 | 41.8 | 3.5 | 9.8 | 41.9 | 3.2 | 9.7 |
| **31** | C16H17FIN3O3.0.5H2O | 42.3 | 4.0 | 9.3 | 42.2 | 3.8 | 9.1 |
| **32** | C14H14FN3O2 | 61.1 | 5.1 | 15.3 | 61.0 | 5.2 | 15.4 |
| **33** | C13H11BrFN3O2 | 45.9 | 3.3 | 12.4 | 46.1 | 3.2 | 12.6 |
| **34** | C15H15BrFN3O4.0.25H2O | 44.5 | 3.9 | 10.4 | 44.3 | 3.5 | 10.2 |
| **36** | C17H15N3O2 | 69.6 | 5.2 | 14.3 | 69.4 | 5.2 | 14.5 |
| **42** | C12H9FIN3O2 | 38.6 | 2.4 | 11.3 | 38.9 | 2.3 | 11.3 |
| **43** | C14H13FIN3O3.0.5H2O | 39.5 | 3.3 | 9.9 | 39.7 | 3.2 | 9.8 |
| **44** | C15H15FIN3O3 | 41.8 | 3.5 | 9.8 | 41.6 | 3.2 | 9.5 |
| **53** | C14H13FIN3O2 | 41.9 | 3.3 | 10.5 | 42.4 | 3.4 | 10.5 |
| **54** | C15H15FIN3O2 | 43.4 | 3.6 | 10.1 | 43.5 | 3.7 | 9.9 |
| **55** | C17H19FIN3O4 | 43.0 | 4.0 | 8.8 | 42.6 | 4.0 | 8.6 |
| **56** | C16H14FIN4O2 | 43.7 | 3.2 | 12.7 | 44.2 | 3.1 | 12.5 |
| **58** | C14H13FIN3O3 | 40.3 | 3.1 | 10.1 | 40.4 | 2.9 | 9.8 |
| **60** | C15H15FIN3O3 | 41.8 | 3.5 | 9.8 | 42.0 | 3.4 | 9.6 |
| **62** | C14H11FIN3O4.0.5H2O | 38.2 | 2.7 | 9.5 | 38.0 | 2.4 | 9.1 |
| **63** | C15H13FIN3O2 | 43.6 | 3.2 | 10.2 | 43.6 | 3.3 | 10.0 |
| **64** | C15H15FIN3O4 | 40.3 | 3.4 | 9.4 | 40.7 | 3.7 | 9.5 |
| **71** | C13H11Cl2N3O2 | 50.0 | 3.6 | 13.5 | 50.0 | 3.2 | 13.2 |
| **74** | C15H12FN3O2.0.25H2O | 62.2 | 4.4 | 14.5 | 62.6 | 4.1 | 14.6 |
| **75** | C15H16FN3O2 | 62.3 | 5.6 | 14.5 | 62.5 | 5.4 | 14.8 |
| **78** | C16H18FN3O3 | 60.2 | 5.7 | 13.2 | 60.5 | 5.8 | 13.3 |

**Table 2. HRMS and HPLC for Target Compounds**

|  | HRMS |  |  | HPLC |
| --- | --- | --- | --- | --- |
| Cmpd | Formula | Calcd. | Found |  |
| **28** | C14H14FIN3O2 (MH+) | 402.0115 | 402.0119 | 98% |
| **29** | C15H16FIN3O2 (MH+) | 416.0271 | 416.0270 | 98% |
| **35** | C17H12F10N3O2 (MH+) | 480.0770 | 480.0762 | 96% |
| **72** | C14H15FN3O2S(MH+) | 308.0870 | 308.0871 | 92% |
| **76** | C14H11FN4O2 (MH+) | 287.0944 | 287.0939 | 98% |

**Table 3. Elemental Analyses for Selected Intermediates**

|  |  | Calcd | | | Found | | |
| --- | --- | --- | --- | --- | --- | --- | --- |
| Cmpd |  | C | H | N | C | H | N |
| **11** | C14H11ClFIN2O2 | 40.0 | 2.6 | 6.7 | 40.3 | 2.2 | 6.7 |
| **17** | C16H17FN2O3 | 63.2 | 5.6 | 9.2 | 63.1 | 5.7 | 9.2 |
| **18** | C15H14BrFN2O3 | 48.8 | 3.8 | 7.6 | 49.1 | 3.8 | 7.4 |
| **20** | C19H18N2O3 | 70.8 | 5.6 | 8.7 | 70.8 | 5.5 | 8.7 |
| **40** | C14H12FIN2O3 | 41.8 | 3.0 | 7.0 | 41.9 | 2.8 | 7.0 |
| **46** | C20H22FIN2O5 | 46.5 | 4.3 | 5.4 | 46.7 | 4.2 | 5.5 |
| **47** | C18H17FIN3O3 | 46.1 | 3.7 | 9.0 | 46.4 | 3.6 | 8.9 |
| **48** | C16H16FIN2O3 | 44.7 | 3.8 | 6.5 | 45.0 | 3.6 | 6.4 |
| **49** | C17H18FIN2O3 | 46.0 | 4.1 | 6.3 | 45.8 | 3.9 | 6.0 |
| **51** | C17H16FIN2O3 | 46.2 | 3.7 | 6.3 | 46.5 | 3.6 | 6.2 |

HPLC Trace for Compound **28**

**
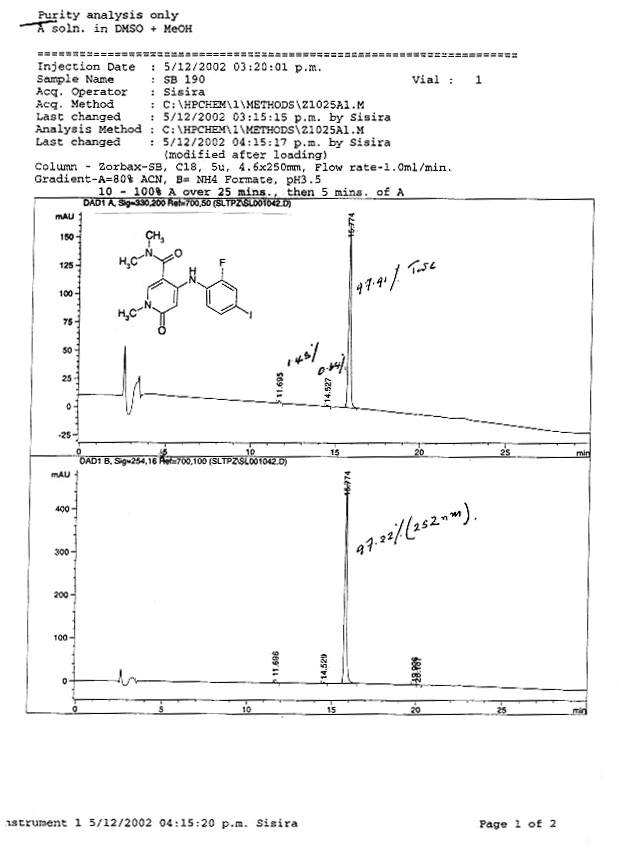
**

HPLC Trace for Compound **29**

**
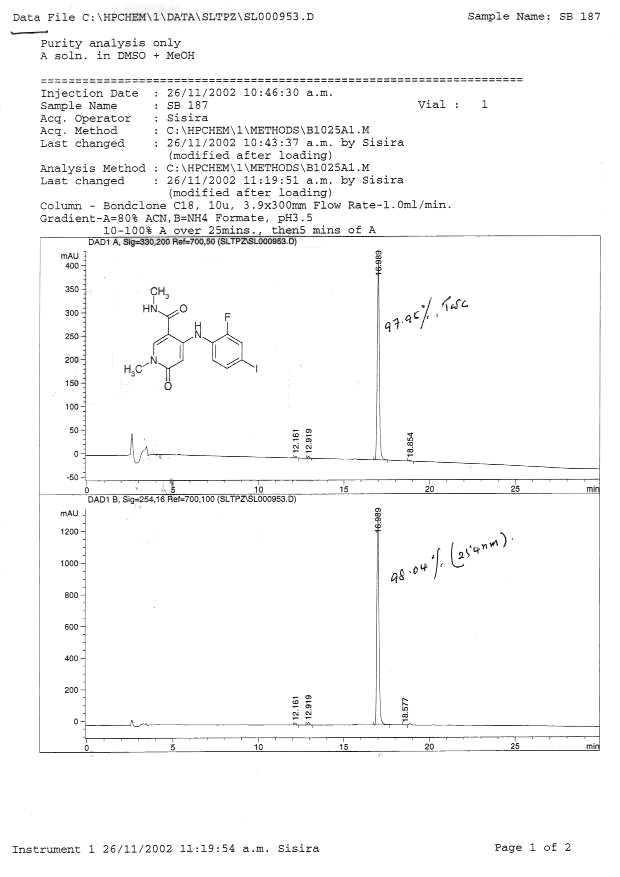
**

HPLC Trace for Compound **35**

**
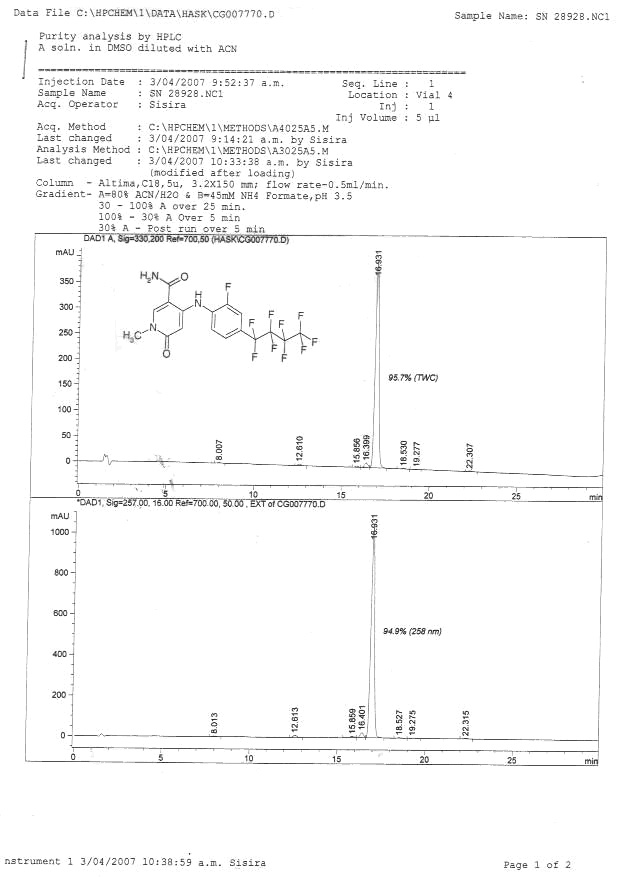
**

HPLC Trace for Compound **72**

HPLC Trace for Compound **76**

**
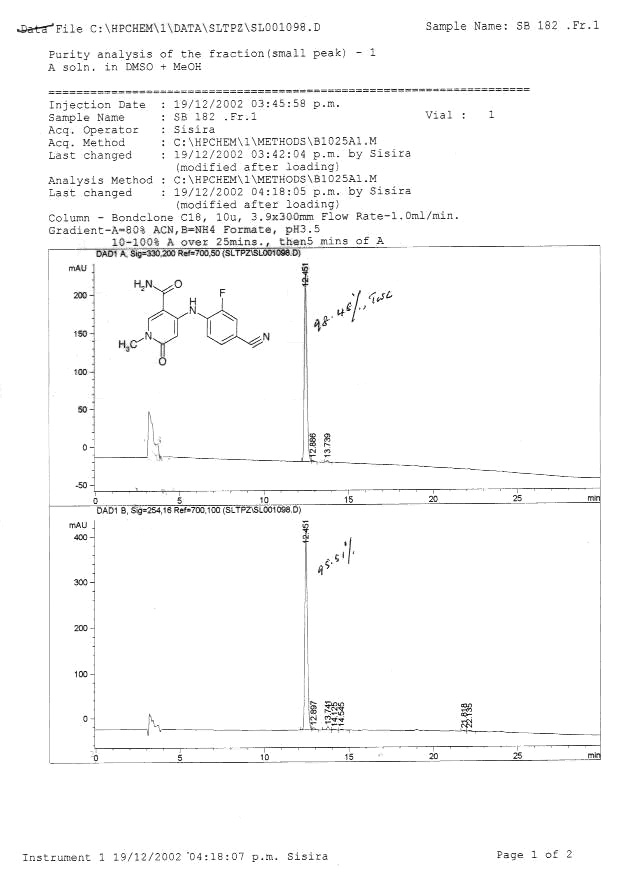
**
